# Supplementary material for: Advancing geodynamic research in Antarctica: Reprocessing GNSS data to infer consistent coordinate time series (GIANT-REGAIN)
Source: Copernicus journal article supplement (doi:10.5194/essd-2024-355), 2024-10-02
Supplement: Supplementary file 1 [file essd-2024-355-supplement.pdf]

## S 1 GPS site overview

Table S1: Overview of the GPS sites in Antarctica considered in this analysis, together with their approximate coordinates. The IERS dome code is provided if assigned to the site by the responsible operator. The occupation mode (occ) is given as episodic (e), continuous (c) or mixed (m). The DOI of the original raw data is provided if available. The network assigned to the GPS station or the station operator is provided; note, that a station may be assigned to several networks.

| ID<br>(chr4) | IERS<br>dome code | site name                   | latitude<br>[deg] | longitude<br>[deg] | elev.<br>[m] | occ | networks/<br>mode operator             | DOI for raw observation<br>data |
|--------------|-------------------|-----------------------------|-------------------|--------------------|--------------|-----|----------------------------------------|---------------------------------|
| A351         |                   | Grove Mountains             | -72.908104        | 74.910121          | 1907         | e   | Geoscience Australia                   |                                 |
| A368         | 66075M001         | Wilson Bluff Base           | -74.290577        | 66.792233          | 1236         | m   | Geoscience Australia                   |                                 |
| ABBZ         |                   | Abbott Peak                 | -77.456880        | 166.908946         | 1736         | m   | POLENET,<br>Erebus GPS Network         | 10.7283/T58W3BDX                |
| ABE1         |                   | Abendberg                   | -67.660386        | 46.107822          | 297          | e   | TU Dresden                             |                                 |
| ABOA         |                   | ABOA                        | -73.043771        | -13.407135         | 469          | c   | Finish Geodetic<br>Institute           |                                 |
| AERO         |                   | Aerodromnaja                | -70.794363        | 11.620468          | 515          | e   | TU Dresden                             |                                 |
| ALN0         |                   | Allan Hills                 | -76.710825        | 159.528484         | 1961         | e   | TAMDEF                                 |                                 |
| ANT0         |                   | Ant Hill                    | -78.775735        | 161.455286         | 1052         | e   | TAMDEF                                 |                                 |
| ARHT         | 66001M005         | Arrival Heights,<br>McMurdo | -77.829437        | 166.663653         | 135          | c   | IGS                                    |                                 |
| ARR0         |                   | Arrival Heights 0           | -77.837921        | 166.664064         | 95           | e   | TAMDEF                                 |                                 |
| ARR1         |                   | Arrival Heights 1           | -77.837882        | 166.660445         | 89           | e   | TAMDEF                                 |                                 |
| ARR2         |                   | Arrival Heights 2           | -77.837594        | 166.682458         | 107          | e   | TAMDEF                                 |                                 |
| ARR3         |                   | Arrival Heights 3           | -77.839397        | 166.645938         | 79           | e   | TAMDEF                                 |                                 |
| ARR5         |                   | Arrival Heights 5           | -77.842016        | 166.696815         | 70           | e   | TAMDEF                                 |                                 |
| ARR6         |                   | Arrival Heights 6           | -77.844829        | 166.641699         | -35          | e   | TAMDEF                                 |                                 |
| ART1         | 66017M001         | Base Artigas                | -62.184508        | -58.902522         | 33           | e   | SCAR                                   |                                 |
| BACK         |                   | Backer Island               | -74.430442        | -102.478189        | 32           | m   | POLENET                                | 10.7283/T5D21VWM                |
| BEA0         |                   | bea0                        | -77.808721        | 160.617983         | 1823         | e   | TAMDEF                                 |                                 |
| BEA2         |                   | bea2                        | -77.831434        | 160.560641         | 1913         | e   | TAMDEF                                 |                                 |
| BEA3         |                   | bea3                        | -77.849496        | 160.778475         | 2147         | e   | TAMDEF                                 |                                 |
| BEA4         |                   | bea4                        | -77.862592        | 160.759832         | 2142         | e   | TAMDEF                                 |                                 |
| BEAN         | 66077M001         | Bean Peaks                  | -75.956299        | -69.302167         | 892          | c   | UKANET, CAPGIA                         | 10.7283/287S-DC54               |
| BEAR         |                   | Bear Peninsula              | -74.579003        | -111.887680        | 439          | e   | TU Dresden                             |                                 |
| BEJ2         |                   | BEJ2                        | -62.663026        | -60.385953         | 56           | e   | RGAE                                   |                                 |
| BELG         | 66018M002         | Belgrano II                 | -77.874803        | -34.626749         | 246          | c   | Instituto Antártico<br>Argentino, SCAR | 10.1594/PANGAEA.913837          |
| BELL         |                   | Bellingshausen              | -62.197580        | -58.958291         | 30           | e   | SCAR                                   |                                 |
| BENN         |                   | Bennett Nunatak             | -84.786458        | -116.459808        | 1416         | c   | POLENET                                | 10.7283/T5891447                |
| BERP         |                   | Bear Peninsula              | -74.545937        | -111.884589        | 312          | m   | POLENET                                | 10.7283/T54J0CC2                |
| BFT0         |                   | Beaufort Island             | -76.948850        | 166.979861         | 465          | e   | TAMDEF                                 |                                 |
| BHIL         | 66073M001         | Bunger Hills                | -66.251367        | 100.598580         | 18           | c   | Geoscience Australia                   |                                 |
| BIR0         |                   | Cape Bird                   | -77.277980        | 166.395121         | 106          | e   | TAMDEF                                 |                                 |
| BOMZ         |                   | Bombs                       | -77.508950        | 167.440189         | 1961         | m   | POLENET,Antarctica<br>L1 GPS Network   | 10.7283/T5DN4353                |
| BORC         |                   | Base Orcadas                | -60.739784        | -44.740623         | 121          | c   | RAMSAC                                 |                                 |
| BRA0         |                   | Bratina Island              | -78.006515        | 165.547788         | 36           | e   | TAMDEF                                 |                                 |
| BREN         | 66080M001         | Brennecke<br>Nunataks       | -72.672886        | -63.025734         | 1645         | c   | UKANET                                 |                                 |
| BRIP         |                   | Brimstone Peak              | -75.795669        | 158.469144         | 2111         | c   | POLENET                                | 10.7283/T5W09473                |

| ID (chr4) | IERS dome code | site name            | latitude [deg] | longitude [deg] | height [m] | occ mode | networks/ operator          | DOI for raw observation data |
|-----------|----------------|----------------------|----------------|-----------------|------------|----------|-----------------------------|------------------------------|
| BRM0      |                | Brimstone Peak       | -75.800251     | 158.468787      | 2084       | e        | TAMDEF                      |                              |
| BRO0      |                | Brosnahan Island     | -79.478749     | 160.972322      | 151        | e        | TAMDEF                      |                              |
| BSA1      | 66081M001      | Horseshoe Harbour    | -67.816043     | -67.290711      | 128        | c        | UKANET                      | 10.7283/A0W2-7N29            |
| BTL0      |                | Bettle Peak          | -77.782905     | 163.528692      | 1385       | e        | TAMDEF                      |                              |
| BUMS      |                | Bumstead Nunatak     | -85.961493     | 174.499139      | 2642       | c        | POLENET                     | 10.7283/T50R9MP7             |
| BUR0      |                | Butcher Ridge        | -79.149222     | 155.906070      | 2009       | e        | TAMDEF                      |                              |
| BURI      | 66065M002      | Butcher Ridge        | -79.147437     | 155.894158      | 2006       | c        | POLENET (New Zealand)       | 10.7283/T5RB72W7             |
| BVLK      |                | Beaver Lake          | -70.813962     | 68.074513       | 145        | e        | ANU                         |                              |
| CAD2      | 66092M001      | Mt Brown             | -68.566501     | 86.100619       | 1943       | c        | Geoscience Australia        | 10.1029/2021GL097232         |
| CAD3      | 66101M001      | Gillies Island       | -66.521067     | 96.363661       | 83         | c        | Geoscience Australia        | 10.1029/2021GL097232         |
| CAD4      | 66093M001      | Mt Strathcona        | -67.419666     | 99.143784       | 1272       | c        | Geoscience Australia        | 10.1029/2021GL097232         |
| CAD5      | 66091M001      | Snyder Rocks         | -66.552462     | 107.764010      | 48         | c        | Geoscience Australia        | 10.1029/2021GL097232         |
| CAD6      | 66099M001      | Chick Island         | -66.789281     | 120.990851      | -14        | c        | Geoscience Australia        | 10.1029/2021GL097232         |
| CAPF      |                | Cape Framnes         | -66.012072     | -60.558358      | 100        | c        | UKANET, LARISSA             | 10.7283/MYTG-8B17            |
| CAS1      | 66011M001      | Casey                | -66.283359     | 110.519706      | 22         | c        | IGS                         |                              |
| CJAM      |                | Cape James Smith Is. | -63.096525     | -62.716202      | 21         | e        | TAMDEF                      |                              |
| CLRK      |                | Clarke Mountains     | -77.340077     | -141.873812     | 1000       | c        | POLENET                     | 10.7283/T5MK6B6C             |
| COAT      |                | Mt. Coates           | -77.805887     | 161.998181      | 1877       | e        | POLENET                     | 10.7283/T5GT5KGN             |
| CON0      |                | Conway Range         | -79.207734     | 159.930212      | 1261       | e        | TAMDEF                      |                              |
| CON1      |                | Conrad1              | -71.716658     | 9.649710        | 1704       | e        | TUD                         |                              |
| CON2      |                | Truncated Cones      | -77.534919     | 167.084376      | 3400       | c        | POLENET, Erebus GPS Network | 10.7283/T5QZ282Z             |
| CONG      |                | Truncated Cones      | -77.534591     | 167.085475      | 3403       | c        | POLENET, Erebus GPS Network | 10.7283/T5RX996S             |
| COTE      | 66096M001      | Mt. Coates           | -77.805902     | 161.997808      | 1878       | c        | IGS                         | 10.7283/T5GT5KGN             |
| CRDI      |                | Cordiner Peak        | -82.861523     | -53.199140      | 945        | m        | POLENET                     | 10.7283/T5C24TQS             |
| CRN0      |                | Mount Crean          | -77.872151     | 159.531092      | 2627       | e        | TAMDEF                      |                              |
| CRZ0      |                | Cape Crozier         | -77.512964     | 169.333036      | 314        | e        | TAMDEF                      |                              |
| CWAL      |                | Cape Wallace Low Is. | -63.245315     | -62.183299      | 37         | e        | TAMDEF                      |                              |
| DAL1      | 66019M001      | Jubany, Dallmann     | -62.240714     | -58.677792      | 41         | e        | AWI                         |                              |
| DAL2      |                | Jubany, Dallmann     | -62.240743     | -58.678298      | 44         | c        | AWI                         |                              |
| DAL5      | 66019M003      | Jubany, Dallman      | -62.240741     | -58.678296      | 44         | c        | AWI                         | 10.1594/PANGAEA.941497       |
| DALL      | 66019M002      | Jubany, Dallmann     | -62.237871     | -58.664545      | 39         | c        | AWI                         |                              |
| DALT      |                | Dalton Corner        | -73.677868     | 68.505588       | 1127       | e        | ANU                         |                              |
| DAV1      | 66010M001      | Davis Station        | -68.577323     | 77.972614       | 44         | c        | IGS                         |                              |
| DEV0      |                | Deveall Island       | -81.475844     | 161.974907      | 68         | e        | TAMDEF                      |                              |
| DEVI      |                | Deverall Island      | -81.476721     | 161.977078      | 67         | c        | POLENET                     | 10.7283/T57942Z0             |
| DLM1      |                | Dallmann 1           | -71.762479     | 10.172421       | 1729       | e        | TU Dresden                  |                              |
| DOO1      |                | Mount Doorly 1       | -77.366617     | 163.024393      | 461        | e        | TAMDEF                      |                              |
| DOO2      |                | Mount Doorly 2       | -77.391699     | 162.758466      | 1147       | e        | TAMDEF                      |                              |
| DRY1      |                | Drygalski1           | -71.698028     | 7.977026        | 1519       | e        | TU Dresden                  |                              |
| DUM1      | 91501M001      | Dumont d'Urville     | -66.665084     | 140.001931      | -1         | c        | IGS                         |                              |
| DUMG      | 91501M003      | Dumont d'Urville     | -66.665185     | 140.002188      | -2         | c        | IGS                         |                              |
| DUPT      |                | Duthiers Point       | -64.804951     | -62.816901      | 43         | c        | UKNET, LARISSA              | 10.7283/3PEK-C029            |

| ID<br>(chr4) | IERS<br>dome code | site name               | latitude<br>[deg] | longitude<br>[deg] | height<br>[m] | occ<br>mode | networks/<br>operator                  | DOI for raw observation<br>data |
|--------------|-------------------|-------------------------|-------------------|--------------------|---------------|-------------|----------------------------------------|---------------------------------|
| DWT0         |                   | Mount Dewitt            | -77.217167        | 159.854155         | 2100          | e           | TAMDEF                                 |                                 |
| E1G2         |                   | E1G2                    | -77.530377        | 167.139552         | 3654          | c           | POLENET,<br>Erebus GPS Network         | 10.7283/T57W69BF                |
| ELE1         | 66021M001         | Elephant Island         | -61.480723        | -55.631354         | 124           | e           | TU Dresden                             |                                 |
| ELHT         |                   | Mt. Erebus Lower<br>Hut | -77.510450        | 167.146065         | 3347          | c           | POLENET,<br>Erebus GPS Network         | 10.7283/T5N58JGC                |
| ELPH         |                   | Elephant Island         | -61.220044        | -55.136564         | 26            | e           | SCARP                                  |                                 |
| ERE0         |                   | Erebus 0                | -77.511132        | 167.153466         | 3357          | e           | TAMDEF                                 |                                 |
| ESH0         |                   | Esser Hill              | -77.936587        | 164.080773         | 1182          | e           | TAMDEF                                 |                                 |
| ESP1         | 66022M001         | Esperanza               | -63.395088        | -56.996083         | 27            | e           | Instituto Antártico<br>Argentino, SCAR |                                 |
| FALL         |                   | Fallone Nunataks        | -85.306416        | -143.631699        | 260           | c           | POLENET                                | 10.7283/T53J3B84                |
| FIE0         |                   | Franklin Island         | -76.144593        | 168.423526         | 154           | c           | POLENET,<br>TAMDEF                     | 10.7283/T5KK993F                |
| FLM0         |                   | Mt. Fleming             | -77.533391        | 160.272527         | 1868          | e           | POLENET<br>TAMDEF                      |                                 |
| FLM5         | 66061M002         | Mt. Fleming             | -77.532729        | 160.271408         | 1870          | c           | POLENET<br>UNAVCO                      | 10.7283/T5V40SH6                |
| FONP         |                   | Foyen Point             | -65.245353        | -61.646851         | 95            | c           | UKANET<br>LARISSA                      | 10.7283/T5668BG6                |
| FOR1         | 66023M001         | Forster 1               | -70.777940        | 11.825064          | 153           | e           | TUD                                    |                                 |
| FOR2         | 66023M002         | Forster 2               | -70.774226        | 11.836787          | 129           | e           | TUD                                    |                                 |
| FOR3         |                   | Forster 3               | -70.774259        | 11.836294          | 128           | e           | TUD                                    |                                 |
| FOS1         | 66024M001         | Fossil Bluff            | -71.313347        | -68.320844         | 159           | m           | UKANET,<br>CAPGIA                      | 10.7283/EM8S-B968               |
| FREI         | 66012S001         | Base Frei               | -62.194103        | -58.980503         | 72            | c           | SCARP                                  |                                 |
| FRK0         |                   | Franklin Island         | -76.164283        | 168.381718         | 192           | e           | TAMDEF                                 |                                 |
| FTP0         |                   | Fishtail Point          | -78.927279        | 162.564386         | 245           | e           | TAMDEF                                 |                                 |
| FTP4         | 66062M002         | Fishtail Point          | -78.927673        | 162.564700         | 243           | c           | POLENET,<br>UNAVCO                     | 10.7283/T5B27SKD                |
| GLDK         |                   | Gould Knoll             | -72.233050        | -100.587581        | 55            | c           | POLENET                                |                                 |
| GMEZ         | 66083M001         | Gomez Nunatak           | -73.885468        | -68.536465         | 1420          | c           | UKNET,<br>CAPGIA                       | 10.7283/96BX-MN68               |
| GRA1         |                   | Granat                  | -67.659328        | 45.853488          | 75            | e           | TUD                                    |                                 |
| HAA1         | 66025M001         | Haag Nunatak            | -77.038103        | -78.285829         | 1173          | e           | SCAR                                   |                                 |
| HAAG         |                   | Haag Nunatak            | -77.038052        | -78.287116         | 1171          | m           | POLENET                                | 10.7283/T5FT8JB8                |
| HOG2         |                   | Hooper Shoulder         | -77.531451        | 166.933616         | 2072          | c           | POLENET,<br>Erebus GPS Network         | 10.7283/T5HT2MM1                |
| HOOZ         |                   | Hoopers Shoulder        | -77.531605        | 166.932629         | 2070          | c           | POLENET,<br>Erebus GPS Network         | 10.7283/T5HD7SRN                |
| HOWE         |                   | Mt. Howe                | -87.415655        | -149.433285        | 2582          | m           | POLENET                                | 10.7283/T5ZW1J65                |
| HOWN         |                   | Howard Nunatak          | -77.528038        | -86.767337         | 1478          | m           | POLENET                                | 10.7283/T56971WH                |
| HTON         | 66084M001         | Hutton Mountains        | -74.080008        | -61.730593         | 950           | c           | UKANET,<br>CAPGIA                      | 10.7283/W4VM-G659               |
| HUGO         |                   | Hugo Island             | -64.962562        | -65.667541         | 21            | m           | UKANET,<br>CAPGIA                      | 10.7283/KN7J-R036               |
| HUM1         |                   | Humboldt                | -71.593699        | 11.295748          | 1736          | e           | TUD                                    |                                 |
| IGGY         |                   | Iggy Ridge              | -83.307206        | 156.249740         | 1898          | c           | POLENET                                | 10.7283/T5QC01T9                |
| INMN         |                   | Inman Nunatak           | -74.820865        | -98.880467         | 678           | c           | POLENET                                | 10.7283/T52N50J2                |
| INS1         |                   | Insel                   | -71.435266        | 11.565761          | 1456          | e           | TU Dresden                             |                                 |

| ID<br>(chr4) | IERS<br>dome code | site name                              | latitude<br>[deg] | longitude<br>[deg] | height<br>[m] | occ<br>mode | networks/<br>operator                                                                    | DOI for raw observation<br>data |
|--------------|-------------------|----------------------------------------|-------------------|--------------------|---------------|-------------|------------------------------------------------------------------------------------------|---------------------------------|
| IZR0         |                   | IZR0                                   | -75.453784        | 162.571416         | 179           | e           | TAMDEF                                                                                   |                                 |
| JNSN         | 66085M001         | Jensen Nunataks                        | -73.076505        | -66.102197         | 1374          | c           | UKANET,<br>CAPGIA                                                                        | 10.7283/GBH7-V292               |
| JUAN         |                   | Base Juan Carlos<br>Livingston Island  | -62.662286        | -60.396096         | 66            | e           | SCARP                                                                                    |                                 |
| KEPA         | 42701M001         | King Edward<br>Point                   | -54.295245        | -36.514290         | 346           | c           | Antarctica PI Contin-<br>uous                                                            |                                 |
| KER0         |                   | Cape Kerr                              | -80.067298        | 160.347700         | 60            | e           | TAMDEF                                                                                   |                                 |
| KOH1         | 66026M001         | Kliment Ohridski                       | -62.641598        | -60.363736         | 44            | e           | SCAR                                                                                     |                                 |
| KOH2         | 66026M002         | St. Kliment<br>Ohridski                | -62.640081        | -60.363768         | 53            | e           | University of Archi-<br>tecture, Civil Engi-<br>neering and Geodesy<br>(UACEG), Bulgaria |                                 |
| KOTA         | 66027M001         | Kottas Mountains                       | -74.300049        | -9.756480          | 1423          | e           | TU Dresden                                                                               |                                 |
| LANG         |                   | Langhovde                              | -69.242795        | 39.714108          | 28            | e           | JARE                                                                                     |                                 |
| LDBF         |                   | Landing Bluff                          | -69.742292        | 73.710389          | 133           | m           | ANU                                                                                      |                                 |
| LEHG         |                   | Lower Erebus Hut                       | -77.510663        | 167.141074         | 3346          | c           | POLENET,<br>Erebus GPS Network                                                           | 10.7283/T54747ZF                |
| LEN1         |                   | Leningradskaya                         | -69.501026        | 159.396010         | 259           | c           | TUD                                                                                      |                                 |
| LNTK         | 66086M001         | Lyon Nunataks                          | -74.835160        | -73.903222         | 1191          | c           | UKANET,<br>CAPGIA                                                                        | 10.7283/Z236-VE05               |
| LPLY         |                   | Lepley Nunatak                         | -73.111116        | -90.299470         | 127           | c           | POLENET                                                                                  | 10.7283/T5DV1H50                |
| LWN0         | 66068M001         | Lonewolf<br>Nunatak                    | -81.345940        | 152.731609         | 1529          | c           | POLENET, TAMDEF                                                                          | 10.7283/T5T43RD8                |
| LXAA         | 66072M002         | LXAA                                   | -71.946578        | 23.346158          | 1389          | c           | University of Luxem-<br>bourg                                                            |                                 |
| MACG         |                   | MacIntosh                              | -77.532531        | 167.246639         | 3279          | c           | POLENET,<br>Erebus GPS Network                                                           | 10.7283/T5VQ30S8                |
| MAJK         |                   | Najak Nunatak                          | -81.660988        | -21.873793         | 1447          | c           | UKANET                                                                                   |                                 |
| MANT         |                   | Mount Manthe                           | -74.779277        | -99.368076         | 467           | e           | TU Dresden                                                                               |                                 |
| MAR1         | 66029M001         | Marambio                               | -64.244942        | -56.656961         | 230           | e           | SCAR                                                                                     |                                 |
| MAS0         |                   | Mason Spur                             | -78.545457        | 164.416526         | 1011          | e           | TAMDEF                                                                                   |                                 |
| MAW1         | 66004M001         | Mawson Station                         | -67.604766        | 62.870716          | 59            | c           | IGS                                                                                      |                                 |
| MBF0         |                   | Minna Bluff                            | -78.646824        | 167.157732         | 735           | e           | TAMDEF                                                                                   |                                 |
| MBIO         | 41577M001         | Base Marambio                          | -64.240391        | -56.622731         | 222           | c           | RAMSAC                                                                                   |                                 |
| MBL1         |                   | MBL1                                   | -78.029048        | -155.021083        | 502           | e           | WAGN                                                                                     |                                 |
| MBL2         |                   | MBL2                                   | -76.322242        | -144.305124        | 966           | e           | WAGN                                                                                     |                                 |
| MBL3         |                   | MBL3                                   | -77.339997        | -141.873615        | 998           | e           | WAGN                                                                                     |                                 |
| MCAR         |                   | Mount Carbone                          | -76.322196        | -144.303518        | 965           | c           | POLENET                                                                                  | 10.7283/T55D8Q41                |
| MCG2         |                   | MacIntosh<br>Ridge2                    | -77.532248        | 167.245230         | 3291          | e           | POLENET,<br>Erebus GPS Network                                                           | 10.7283/T5VT1QFR                |
| MCM4         | 66001M003         | McMurdo GPS<br>Station                 | -77.838348        | 166.669324         | 98            | c           | IGS                                                                                      |                                 |
| MCMC         | 66001M003         | McMurdo L2C                            | -77.838349        | 166.669329         | 98            | c           | other                                                                                    | 10.7283/ZWER-J158               |
| MCMD         |                   | McMurdo Com-<br>munity Base<br>Station | -77.838349        | 166.669329         | 98            | c           | other                                                                                    | 10.7283/T5FB514D                |
| MCRG         |                   | Miller Crag                            | -73.667799        | -94.646322         | 1334          | c           | POLENET                                                                                  |                                 |
| MELM         | 66088M001         | Mid-Ellsworth<br>Mountains             | -79.190845        | -85.499756         | 1441          | c           | UKANET,<br>iSTAR-D                                                                       | 10.7283/T5PR7TC4                |

| ID<br>(chr4) | IERS<br>dome code | site name                                  | latitude<br>[deg] | longitude<br>[deg] | height<br>[m] | occ<br>mode | networks/<br>operator          | DOI for raw observation<br>data |
|--------------|-------------------|--------------------------------------------|-------------------|--------------------|---------------|-------------|--------------------------------|---------------------------------|
| MIN0         |                   | Minna Bluff                                | -78.650308        | 167.163793         | 677           | c           | POLENET,<br>(New Zealand)      | 10.7283/T5TM78BX                |
| MIR3         |                   | Mirny 3                                    | -66.552511        | 93.007095          | 11            | e           | TU Dresden                     |                                 |
| MKIB         | 66076M001         | Mt. McKibben                               | -75.276195        | -65.603149         | 1156          | c           | UKANET,<br>CAPGIA              | 10.7283/SDBA-D262               |
| MRAN         |                   | Morro Rancagua                             | -63.321022        | -57.894394         | 53            | e           | SCARP                          |                                 |
| M RTP        |                   | Martin Peninsula                           | -74.180405        | -115.102136        | 96            | c           | POLENET                        |                                 |
| MTAK         |                   | Mount Takahe                               | -76.315041        | -112.800012        | 1328          | c           | POLENET                        |                                 |
| MTCX         |                   | Mount Cox                                  | -78.520240        | 162.533824         | 2131          | e           | JPL                            | 10.7283/T5FQ9TR9                |
| MTJN         | 66090M001         | Mount Johns                                | -79.627018        | -91.281288         | 2161          | m           | UKANET,<br>iSTAR-D             | 10.7283/WKTB-DM81               |
| MURP         |                   | Mt. Murphy                                 | -75.369283        | -111.294097        | 657           | e           | TU Dresden                     |                                 |
| NAUS         |                   | Nausea Knob                                | -77.521960        | 167.147143         | 3572          | c           | POLENET,<br>Erebus GPS Network | 10.7283/T5CN721Q                |
| NONS         |                   | Nonshøgda                                  | -72.007755        | 2.529787           | 1427          | c           | Norwegian Polar In-<br>stitute |                                 |
| NOT1         | 66031M001         | Notter Point                               | -63.674190        | -59.208200         | 65            | e           | SCAR                           |                                 |
| OHG1         | 66008M003         | O'Higgins                                  | -63.321506        | -57.899841         | 30            | e           | SCAR                           |                                 |
| OHI2         | 66008M005         | O'Higgins /<br>Antarctica                  | -63.321081        | -57.901334         | 32            | c           | IGS                            |                                 |
| OHI3         | 66008M006         | O'Higgins                                  | -63.321093        | -57.901387         | 33            | c           | IGS                            |                                 |
| OHIG         | 66008M001         | O'Higgins /<br>Antarctica                  | -63.320724        | -57.900341         | 31            | c           | IGS (former), BKG              |                                 |
| OTR1         |                   | Otradnaja1                                 | -71.205133        | 13.559419          | 1030          | e           | TU Dresden                     |                                 |
| PADD         |                   | Padda Island                               | -69.618213        | 38.276018          | 121           | e           | JARE                           |                                 |
| PAL1         | 66005M001         | Palmer                                     | -64.773784        | -64.046603         | 41            | e           | SCAR                           |                                 |
| PAL2         | 66005M002         | Palmer Commu-<br>nity Base Station         | -64.775090        | -64.051122         | 31            | c           | OSU                            | 10.7283/T5PV6HKR                |
| PALM         | 66005M002         | Palmer Commu-<br>nity Base Station<br>P.S. | -64.775091        | -64.051125         | 31            | c           | IGS                            | 10.7283/T5PV6HKR                |
| PALV         | 66005M002         | Palmer Station                             | -64.775090        | -64.051121         | 31            | c           | other                          |                                 |
| PATN         |                   | Mount Paterson                             | -78.030046        | -155.022892        | 514           | m           | POLENET                        | 10.7283/T5PC30PX                |
| PECE         |                   | Pecora Escarp-<br>ment                     | -85.611920        | -68.556334         | 1490          | m           | POLENET                        | 10.7283/T5930RG1                |
| PET1         | 66032M001         | Peter I Island                             | -68.863514        | -90.426153         | 32            | e           | TU Dresden                     |                                 |
| PET1         |                   | Kontaktnaja                                | -71.372231        | 12.617846          | 1252          | e           | TU Dresden                     |                                 |
| PHIG         |                   | Mount Erebus<br>West                       | -77.525494        | 167.049920         | 3126          | c           | POLENET,<br>Erebus GPS Network | 10.7283/T5WQ01XN                |
| PIG2         |                   | Pine Island 2                              | -74.510972        | -102.439378        | 15            | e           | TU Dresden                     |                                 |
| PIRT         |                   | Pirrot Hills                               | -81.103206        | -85.142569         | 1257          | c           | POLENET                        | 10.7283/T5WW7FZF                |
| PRA1         | 66033M001         | Arturo Prat                                | -62.477579        | -59.650271         | 81            | e           | SCAR                           |                                 |
| PRAT         |                   | Arturo Prat IGM<br>mark                    | -62.477873        | -59.649584         | 80            | e           | SCARP                          |                                 |
| PROA         |                   | Progress Astrop-<br>unkt                   | -69.380848        | 76.386542          | 65            | e           | TU Dresden                     |                                 |
| PROG         |                   | Progress                                   | -69.379143        | 76.379906          | 70            | e           | TU Dresden                     |                                 |
| PRPT         |                   | Prospect Point                             | -66.006716        | -65.339350         | 18            | c           | UKANET,<br>LARISSA             | 10.7283/Q1FR-9E17               |
| PRTT         |                   | Arturo Prat<br>Greenwich Is                | -62.484294        | -59.666132         | 33            | e           | SCARP                          |                                 |

| ID<br>(chr4) | IERS<br>dome code | site name           | latitude<br>[deg] | longitude<br>[deg] | height<br>[m] | occ mode | networks/<br>operator                       | DOI for raw observation<br>data |
|--------------|-------------------|---------------------|-------------------|--------------------|---------------|----------|---------------------------------------------|---------------------------------|
| RAMG         |                   | Ramsey Glacier      | -84.338425        | 178.047113         | 1062          | c        | POLENET                                     | 10.7283/T51N7ZFR                |
| RAYG         |                   | Ray Seismic Site    | -77.528772        | 167.170576         | 3715          | c        | POLENET,<br>Erebus GPS Network              | 10.7283/T50G3H8K                |
| REYJ         | 66012M002         | Rey Jorge           | -62.201112        | -58.979211         | 113           | e        | SCAR, Instituto Geografico Militar de Chile |                                 |
| RMBO         |                   | Rambo Nunatak       | -83.873240        | -66.393882         | 777           | c        | POLENET                                     | 10.7283/T5JM27XR                |
| ROB0         |                   | Cape Roberts 0      | -77.035657        | 163.178209         | -54           | e        | TAMDEF                                      |                                 |
| ROB4         | 66063M002         | Cape Roberts        | -77.034439        | 163.190108         | -42           | c        | POLENET<br>(New Zealand)                    | 10.7283/T5NC5ZG8                |
| ROBN         |                   | Robertson Island    | -65.246500        | -59.444633         | 58            | c        | UKANET,<br>LARISSA                          | 10.7283/KY2W-7C65               |
| ROS0         |                   | Cape Ross           | -76.729986        | 163.015926         | -26           | e        | TAMDEF                                      |                                 |
| ROTA         | 66007M001         | Rothera             | -67.571713        | -68.125205         | 32            | e        | SCAR                                        |                                 |
| ROTB         |                   | Rothera             | -67.571320        | -68.126869         | 33            | c        | IGS,<br>UKANET                              | 10.7283/T56M34Z7                |
| ROTH         | 66007M003         | Rothera             | -67.571388        | -68.125776         | 40            | c        | IGS                                         |                                 |
| ROY0         |                   | Cape Royds          | -77.551568        | 166.170624         | -28           | e        | TAMDEF                                      |                                 |
| RUS1         |                   | Russkaya            | -74.767155        | -136.798889        | 96            | m        | TU Dresden                                  |                                 |
| RYN0         |                   | Cape Reynolds       | -75.453784        | 162.571416         | 179           | e        | TAMDEF                                      |                                 |
| SCTB         | 66071M001         | Scott Base          | -77.848986        | 166.758018         | -19           | c        | IGS,<br>POLENET                             | 10.7283/T5CF9N6P                |
| SDLY         |                   | Mount Sidley        | -77.135313        | -125.974578        | 2097          | c        | POLENET                                     | 10.7283/T5S46Q7F                |
| SGP1         |                   | Cape Disappointment | -65.557030        | -61.721642         | 250           | c        | UKANET                                      |                                 |
| SGP3         |                   | Mount Ivins         | -65.941365        | -63.588045         | 1647          | c        | UKANET                                      |                                 |
| SGP4         |                   | Cape Alexander      | -66.685968        | -62.460193         | 258           | c        | UKANET                                      |                                 |
| SGP5         |                   | Marmelon Point      | -67.281975        | -64.890570         | 272           | c        | UKANET                                      |                                 |
| SIG1         | 30607M001         | Signy Island        | -60.707729        | -45.592652         | 49            | e        | SCAR                                        |                                 |
| SKA1         |                   | Skali AANI SE       | -71.308725        | 11.445805          | 1461          | e        | TU Dresden                                  |                                 |
| SKLN         |                   | Skallen             | -69.670993        | 39.398710          | 61            | e        | JARE                                        |                                 |
| SKRV         |                   | Skarvsness          | -69.473792        | 39.607089          | 31            | e        | JARE                                        |                                 |
| SLTR         |                   | Slater Rocks        | -75.098157        | -113.879552        | 513           | c        | POLENET                                     |                                 |
| SMR5         | 66034M002         | San Martin          | -68.129682        | -67.103227         | 27            | c        | AWI, IAA                                    |                                 |
| SMRT         | 43102S001         | San Martin          | -68.129652        | -67.103244         | 26            | m        | TU Dresden                                  | 10.7283/T5X34VKQ                |
| SOG1         |                   | South Georgia 01    | -54.874391        | -36.043754         | 63            | c        | Antarctica PI Continuous                    | 10.7283/T5BZ649J                |
| SOG2         |                   | South Georgia 02    | -54.003231        | -38.048434         | 181           | c        | Antarctica PI Continuous                    | 10.7283/T5765CMK                |
| SOG3         |                   | South Georgia 03    | -54.493940        | -37.037863         | 29            | c        | Antarctica PI Continuous                    | 10.7283/T53J3B7P                |
| SPGT         |                   | Spring Point        | -64.294729        | -61.051988         | 34            | c        | UKANET,<br>LARISSA                          | 10.7283/ZHFM-ZE59               |
| SPPT         |                   | Spring Point        | -64.294429        | -61.051563         | 29            | e        | SCARP                                       |                                 |
| SPR1         | 66035M001         | Punta Spring        | -64.295332        | -61.051900         | 49            | e        | SCAR                                        |                                 |
| SPRZ         | 41576M001         | Base Esperanza      | -63.395120        | -56.995861         | 28            | c        | IGN - Instituto Geografico Nazionale        |                                 |
| STEW         |                   | Steward Hills       | -84.187015        | -86.247299         | 1587          | c        | POLENET                                     | 10.7283/T5HM56QG                |
| SUGG         |                   | Mt. Suggs           | -75.280605        | -72.180134         | 1092          | m        | POLENET                                     | 10.7283/T5CV4G1M                |

| ID<br>(chr4) | IERS<br>dome code | site name                 | latitude<br>[deg] | longitude<br>[deg] | height<br>[m] | occ<br>mode | networks/<br>operator                                   | DOI for raw<br>observation<br>data |
|--------------|-------------------|---------------------------|-------------------|--------------------|---------------|-------------|---------------------------------------------------------|------------------------------------|
| SVEA         |                   | SVEA                      | -74.576037        | -11.225196         | 1261          | c           | KTH Royal Institute<br>of Technology, Swe-<br>den, SCAR |                                    |
| SYOG         | 66006S002         | Syowa                     | -69.006958        | 39.583745          | 50            | c           | IGS                                                     |                                    |
| THRO         |                   | Theron Moun-<br>tains     | -79.126689        | -28.318908         | 1058          | c           | UKNET                                                   |                                    |
| THUR         |                   | Thurston Island           | -72.530066        | -97.559605         | 212           | m           | POLENET                                                 | 10.7283/T5862DRZ                   |
| TNB1         | 66036M001         | Terra Nova Bay            | -74.698805        | 164.102939         | 72            | c           | VLNDEF                                                  |                                    |
| TNB2         |                   | Terra Nova Bay 2          | -74.698924        | 164.102805         | 72            | c           | VLNDEF                                                  |                                    |
| TOMO         |                   | Toney Mountain            | -75.801867        | -114.661904        | 1171          | c           | POLENET                                                 | 10.7283/T5BZ64B0                   |
| TOTK         |                   | Tottuki Misaki            | -68.911207        | 39.819399          | 38            | e           | JARE                                                    |                                    |
| TROL         | 66037M001         | Nonshøgda                 | -72.012034        | 2.538084           | 1314          | c           | other                                                   |                                    |
| TRVE         | 66078M001         | Traverse Moun-<br>tains   | -69.988824        | -67.554711         | 1064          | c           | UKANET,<br>CAPGIA                                       | 10.7283/49BA-YD89                  |
| USE1         |                   | Untersee 1                | -71.344924        | 13.524812          | 814           | e           | TU Dresden                                              |                                    |
| VER1         | 66038M001         | Vernadsky                 | -65.246156        | -64.253418         | 20            | e           | SCAR                                                    |                                    |
| VER3         |                   | Vernadsky                 | -65.245264        | -64.257339         | 19            | c           | SCAR                                                    |                                    |
| VESL         | 66009M001         | Vesleskarvet              | -71.673797        | -2.841783          | 862           | c           | Hartebeesthoek Radio<br>Astronomy Observa-<br>tory      |                                    |
| VL01         |                   | Tombstone Hill            | -72.450137        | 169.725070         | 597           | m           | POLENET,<br>VLNDEF                                      | 10.7283/T5VX0DTM                   |
| VL02         |                   | Mt Finch                  | -72.564875        | 167.378141         | 2047          | e           | VLNDEF                                                  |                                    |
| VL03         |                   | Mt Masley                 | -72.950512        | 162.926406         | 2470          | e           | VLNDEF                                                  |                                    |
| VL04         |                   | Hawkes Heights            | -73.518211        | 169.748653         | 1835          | e           | VLNDEF                                                  |                                    |
| VL05         |                   | Cape Phillips             | -73.063070        | 169.612187         | 478           | e           | VLNDEF                                                  |                                    |
| VL06         |                   | Mt Melbourne              | -74.350001        | 164.690648         | 2671          | e           | VLNDEF                                                  |                                    |
| VL07         |                   | Mt Monteagle              | -73.759899        | 165.379301         | 2039          | e           | VLNDEF                                                  |                                    |
| VL08         |                   | Mt Jiracek                | -73.764284        | 163.739534         | 2655          | e           | VLNDEF                                                  |                                    |
| VL09         |                   | Lichen Hills              | -73.330783        | 162.169395         | 2270          | e           | VLNDEF                                                  |                                    |
| VL10         |                   | Archambault<br>Ridge      | -73.688455        | 162.768592         | 2619          | e           | VLNDEF                                                  |                                    |
| VL11         |                   | Mt Baxter                 | -74.371428        | 162.541667         | 2362          | e           | VLNDEF                                                  |                                    |
| VL12         |                   | Monte Cassino             | -72.274440        | 163.726997         | 1933          | m           | POLENET,<br>VLNDEF                                      | 10.7283/T5MC8X9F                   |
| VL13         |                   | Mt Larsen                 | -74.847797        | 162.204967         | 1460          | e           | VLNDEF                                                  |                                    |
| VL14         |                   | Mt Kinet                  | -73.228247        | 165.905697         | 2084          | e           | VLNDEF                                                  |                                    |
| VL15         |                   | Inexpressible Is-<br>land | -74.934264        | 163.715667         | -28           | e           | VLNDEF                                                  |                                    |
| VL16         |                   | Cape Philippi             | -75.232561        | 162.545486         | 311           | e           | VLNDEF                                                  |                                    |
| VL17         |                   | Evans Height              | -75.095134        | 161.538743         | 684           | e           | VLNDEF                                                  |                                    |
| VL18         |                   | Starr Nunatak             | -75.898532        | 162.593711         | 58            | e           | VLNDEF                                                  |                                    |
| VL19         |                   | Mc Daniel<br>Nunatak      | -75.804973        | 161.781614         | 810           | e           | VLNDEF                                                  |                                    |
| VL20         |                   | Thompson Spur             | -71.543155        | 160.454783         | 1442          | e           | VLNDEF                                                  |                                    |
| VL21         |                   | Husky Pass                | -71.668655        | 163.732935         | 1899          | e           | VLNDEF                                                  |                                    |
| VL22         |                   | Little Rock               | -71.421871        | 162.040434         | 275           | e           | VLNDEF                                                  |                                    |
| VL23         |                   | Cape Adare                | -71.345819        | 170.304674         | 1119          | e           | VLNDEF                                                  |                                    |
| VL27         |                   | Dunedin Range             | -71.357348        | 167.802012         | 1765          | e           | VLNDEF                                                  |                                    |
| VL29         |                   | Mt Draeger                | -71.154077        | 163.896282         | 1624          | e           | VLNDEF                                                  |                                    |

| ID<br>(chr4) | IERS<br>dome code | site name               | latitude<br>[deg] | longitude<br>[deg] | height<br>[m] | occ<br>mode | networks/<br>operator | DOI for raw observation<br>data |
|--------------|-------------------|-------------------------|-------------------|--------------------|---------------|-------------|-----------------------|---------------------------------|
| VL30         |                   | Monte Bruce             | -70.598721        | 162.525141         | 1492          | m           | POLENET,<br>VLNDEF    | 10.7283/T54F1P23                |
| VL32         |                   | Mt Seitz                | -71.733103        | 166.164565         | 1784          | e           | VLNDEF                |                                 |
| VLHG         |                   | Hughes Bluff            | -75.397967        | 162.201717         | 166           | e           | VLNDEF                |                                 |
| VNAD         |                   | Vernadsky Station       | -65.246005        | -64.254163         | 21            | c           | UKANET,<br>LARISSA    | 10.7283/T52F7KQ1                |
| W01B         |                   | W01B                    | -87.415176        | -149.443111        | 2583          | e           | WAGN                  |                                 |
| W02B         |                   | W02B                    | -85.611852        | -68.555464         | 1490          | e           | WAGN                  |                                 |
| W03B         |                   | W03B                    | -81.576975        | -28.402599         | 1195          | e           | WAGN                  |                                 |
| W04A         |                   | W04A                    | -82.861557        | -53.200097         | 944           | e           | WAGN                  |                                 |
| W05A         |                   | W05A                    | -80.039816        | -80.558617         | 664           | e           | WAGN                  |                                 |
| W05B         |                   | W05B                    | -80.039801        | -80.564443         | 661           | e           | WAGN                  |                                 |
| W07A         |                   | W07A                    | -80.320660        | -81.433424         | 784           | e           | WAGN                  |                                 |
| W07B         |                   | W07B                    | -80.322777        | -81.540316         | 918           | e           | WAGN                  |                                 |
| W08A         |                   | W08A                    | -75.280382        | -72.180052         | 1093          | e           | WAGN                  |                                 |
| W09A         |                   | W09A                    | -82.683220        | -104.395563        | 2350          | e           | WAGN                  |                                 |
| W10B         |                   | W10B                    | -74.545977        | -111.883925        | 313           | e           | WAGN                  |                                 |
| W14B         |                   | W14B                    | -77.528742        | -86.765069         | 1473          | e           | WAGN                  |                                 |
| W17B         |                   | W17B                    | -72.530030        | -97.559792         | 211           | e           | WAGN                  |                                 |
| WAL0         |                   | Marble Point            | -77.432452        | 163.820835         | -22           | e           | TAMDEF                |                                 |
| WHN0         | 66069M001         | Westhaven<br>Nunatak    | -79.845698        | 154.220119         | 2193          | c           | POLENET,<br>TAMDEF    | 10.7283/T5R49P2M                |
| WHTM         |                   | Whitmore Moun-<br>tains | -82.683233        | -104.393202        | 2347          | m           | POLENET,<br>TAMDEF    | 10.7283/T5ZP44DZ                |
| WILN         |                   | Wilson Nunatak          | -80.039838        | -80.557942         | 667           | c           | POLENET               | 10.7283/T53F4MX9                |
| WLCH         | 66079M001         | Welch Mountains         | -70.729355        | -63.820411         | 1534          | c           | UKANET,<br>CAPGIA     | 10.7283/5XVC-2N29               |
| WLCT         |                   | Mount Walcott           | -85.369264        | -87.392687         | 1851          | c           | POLENET               | 10.7283/T5TX3CNS                |
| WLRD         | 66089M001         | Mount Woollard          | -80.544112        | -96.637705         | 2317          | c           | UKANET,<br>iSTAR-D    | 10.7283/WP73-9Q90               |
| WRN0         |                   | Warren Range            | -78.417327        | 158.296107         | 2479          | e           | TAMDEF                |                                 |
| WTE0         |                   | White Island            | -78.189746        | 167.495910         | 400           | e           | TAMDEF                |                                 |
| WWAY         |                   | Whichaway<br>Nunata     | -81.577005        | -28.402677         | 1196          | m           | POLENET,<br>TAMDEF    | 10.7283/T5765CN1                |
| ZHON         | 66030M001         | Zhong Shan              | -69.371052        | 76.369851          | 41            | e           | SCAR                  |                                 |



## S 2 GNSS processing

### S 2.1 Processing setup for each analysis center

**Table S2.** GPS processing setups, products and parametrization by the four analysis centres TU Dresden (TUD), Ohio State University (OSU), University of Tasmania (UTAS) and Newcastle University (NEWC)

|                                                                    | TUD                                            | UTAS                                                                                           | OSU                                 | NEWC                                                          |
|--------------------------------------------------------------------|------------------------------------------------|------------------------------------------------------------------------------------------------|-------------------------------------|---------------------------------------------------------------|
| Processing strategy                                                | DGPS                                           | PPP                                                                                            | DGPS                                | DGPS                                                          |
| Processing software                                                | Bernese v5.2                                   | GISPY v6.4                                                                                     | GAMIT/GLOBK 10.71                   | GAMIT/GLOBK 10.70                                             |
| Reference frame                                                    | IGb14                                          | IGb14                                                                                          | IGb14                               | IGb14                                                         |
| Reference frame realization strategy                               | Daily NNT condition on regional IGS core sites | Daily 7-parameter transformation (provided by JPL)                                             | As described in Gómez et al. (2022) | Daily 6-parameter transformation w.r.t. global IGS core sites |
| GNSS                                                               | GPS only                                       | GPS only                                                                                       | GPS only                            | GPS only                                                      |
| Loading corrections                                                |                                                |                                                                                                |                                     |                                                               |
| NATL                                                               | not considered                                 | not considered                                                                                 | not considered                      | applied                                                       |
| NTOL                                                               | not considered                                 | not considered                                                                                 | not considered                      | not considered                                                |
| OTL                                                                | FES2014b                                       | TPXO7.2 and SPOTL                                                                              | FES2014b                            | FES2014b                                                      |
| ATL                                                                | S1/S2 (Ray and Ponte, 2003)                    | not considered                                                                                 | not considered                      | not considered                                                |
| solid earth tides                                                  | IERS 2010                                      | IERS 2010                                                                                      | IERS 2010                           | IERS 2010                                                     |
| Orbit products                                                     | CODE final<br>(repro2 + operational)           | JPL<br>(repro3 + operational)                                                                  | IGS final                           | IGS final<br>(repro3 + operational)                           |
| Earth Orientation parameters                                       | CODE final<br>(repro2 and operational)         | JPL final<br>(repro3 and operational)                                                          | UNSO final                          | UNSO final                                                    |
| solar radiation pressure model                                     | ECOM1                                          | ECOM1                                                                                          | ECOM1                               | ECOM1                                                         |
| Earth albedo                                                       | not considered                                 | not considered                                                                                 | not considered                      | NCLE1                                                         |
| Antenna thrust model                                               | not considered                                 | not considered                                                                                 | not considered                      | ANTBK                                                         |
| Higher order Ionospheric effects                                   | 2nd and 3rd order<br>(CODE GIM)                | 2nd order<br>(JPL IONEX)                                                                       | 2nd order<br>(GMAP IGRF13)          | 2nd order<br>(IGS IONEX)                                      |
| A-priori troposphere model (hydrostatic & wet)                     | VMF3                                           | VMF1                                                                                           | VMF1                                | VMF1                                                          |
| ZTD parametrization                                                | piece wise linear (1h)                         | 5min sampling random walk process with process noise of $5 \times 10^{-8} \text{ km s}^{-0.5}$ | piece wise linear (1h)              | piece wise linear (2h)                                        |
| Ground/satellite antenna phase center variations (PCV)             | igs14.atx                                      | igs14.atx                                                                                      | igs14.atx                           | igs14.atx                                                     |
| Azimuth correction for ground antenna misalignment from true north | yes                                            | not considered                                                                                 | not considered                      | not considered                                                |

## S 2.2 Combination of the AC coordinate time series

- 5 In addition to the approach outlined in Sec. 3.2.3, alternative combination approaches have been tested. We investigated four approaches to combine the coordinate time series. Each approach works on a site by site basis. Approach (a) calculates the unweighted mean for each day for each coordinate component over all four AC solutions (or less, if less solutions are available), (b) as implemented and applied for the final data set, (c) Geometric median and (d) calculates the weighted mean for each day for each coordinate component over all four PC solutions as in (b), but with weights based on the daily variances that are scaled for each site:  $\sigma_{scaled,AC}^2(t) = \sigma_{AC}^2(t)/mean_{t_0..t_n}(\sigma_{AC}^2)$  (normalized variances).

**Table S3.** Assessment of the residual RMS for the combined time series based on different combination approaches: (a) unweighted mean, (b) weighted mean with weights based on daily variances. Variances are scaled so the mean variance equals the variance of the residual time series of a PC, (c) geometric median, (d) weighted mean with weights based on daily variances. Daily variances are scaled in the way that the mean variances equals unity (equal for each PC). Option (b) is used for the data set presented in this study. The mean RMS and median RMS are calculated over all sites of the presented data set.

| combination method | mean RMS [mm]   |      |      |          |      |      | median RMS [mm] |      |      |          |      |      |
|--------------------|-----------------|------|------|----------|------|------|-----------------|------|------|----------|------|------|
|                    | permanent/mixed |      |      | episodic |      |      | permanent/mixed |      |      | episodic |      |      |
|                    | north           | east | up   | north    | east | up   | north           | east | up   | north    | east | up   |
| (a)                | 2.47            | 2.59 | 5.37 | 2.89     | 2.97 | 7.44 | 1.80            | 1.73 | 4.71 | 2.24     | 2.11 | 5.37 |
| (b)                | 2.45            | 2.58 | 5.30 | 2.86     | 2.88 | 7.28 | 1.80            | 1.72 | 4.67 | 2.25     | 2.09 | 5.23 |
| (c)                | 2.51            | 2.62 | 5.49 | 2.93     | 3.03 | 7.48 | 1.85            | 1.76 | 4.86 | 2.26     | 2.19 | 5.50 |
| (d)                | 2.49            | 2.59 | 5.42 | 2.89     | 2.95 | 7.49 | 1.86            | 1.73 | 4.75 | 2.24     | 2.09 | 5.38 |

### S 3 NGL vs GR time series: examples time series for corrected antenna heights

Figure S1 displays the time series of antenna heights and the vertical coordinate component for a selection of sites showing differences in the antenna heights between the GR and NGL data set. The site A368 shows differences in the antenna height for a whole period of measurements in 2004. The error in the antenna height can not be determined from the trajectory of the NGL time series and is, therefore, dangerous (does not constitute an outlier) and could lead to the determination of false uplift rates. The site BEAN shows singular days with offsets in the antenna heights that lead to isolated outliers in the up time series. A similar effect can be observed for MAW1. The antenna and the receiver were changed on 2019-11-11 for the site RMBO, which included a change in the antenna height from 0.000 m to 0.3048 m, leading to a step in the GR time series. The information on the change in antenna height seems to be recorded incorrectly in the RINEX header, leading to the displayed outlier. Even after the correction of the antenna height, an offset between the NGL and GR time series remains.

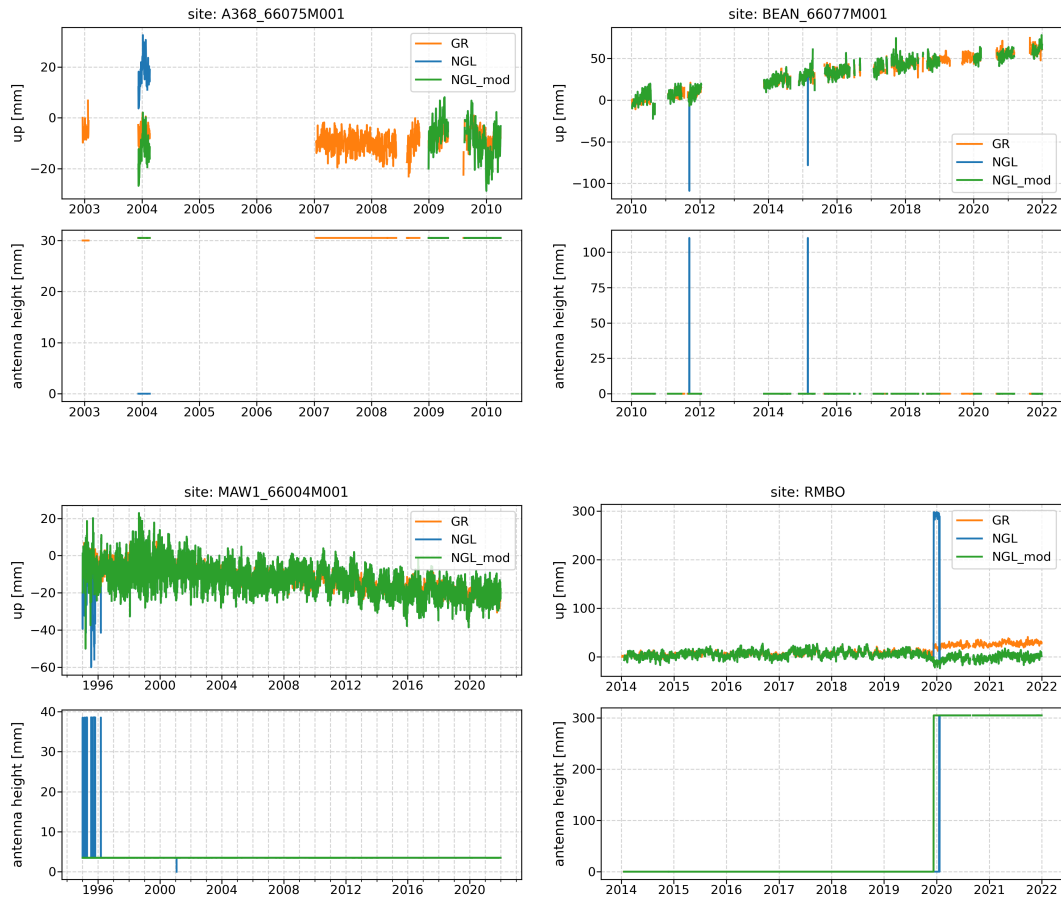

**Figure S1.** Time series of the vertical coordinate component from the GR (orange), NGL (blue) and NGL\_mod with corrected antenna heights according to the GR meta data (green), together with the time series of antenna heights. The sites are selected to demonstrate the effect of false antenna height information on the coordinate trajectory, leading to errors in estimated rates (A368), single outliers (MAW1 and BEAN), or clustered outliers (RMBO).

## S 4 Zenith Total Delay (ZTD)

Zenith troposphere delays are estimated together with the daily station coordinates by each AC (see chapter 3.1). The individual troposphere time series are provided as site-wise time series with one hour resolution for OSU, UTAS and TUD and with a two hour resolution for the NEWC solution.

- 25 Tab. S2 provides an overview over the processing setups for the ZTD estimation (a-priori models and parametrization). The resulting ZTD estimates are expressed as piece-wise linear functions (see S2 for an example time series for site DUPT). Since coordinate solutions are processed on a daily basis, two estimates at the day boundary exist. Therefore, the estimated ZTD values are averaged at the day boundary. Large outliers, exceeding five times the RMS of the de-trended time series, are removed.
- 30 To compare the ZTD results from the individual ACs we investigate for each AC pair:
- the correlation coefficients (Pearson),
  - RMS over the differenced ZTD time series.

We derive correlations coefficients and the RMS over the differenced time series of ZTD for each combination of AC solutions for a selection of 29 stable cGPS sites (see Sec. 3 for an overview of the selected sites) and the complete data set. The resulting mean correlations and RMS values are summarized in table S4. For the sub-selection of sites, the correlation coefficients vary between 0.88 and 1.00 (Fig. S4). The results of OSU-NEWC can be considered nearly identical, reaching an average correlation coefficient of 1.00 for the selected sites and 0.99 over the whole data set, while TUD-UTAS show an average correlation coefficient of 0.99 for the selected sites and 0.97 over the whole data set. The other AC combinations show an average correlation coefficient of 0.93 for the selected sites and between 0.91 and 0.92 for the whole data set. All AC solutions are generally in good agreement, but with better agreement between the processings of NEWC-OSU and TUD-UTAS.

- 40 The same conclusion can be drawn when analyzing the RMS over the differenced time series. Smallest mean RMS are reached for the combinations NEWC-OSU and TUD-UTAS reaching 1.5 mm and 3.3 mm for the selection of stable sites, respectively (Fig. S5).

**Table S4.** Mean correlation coefficients and mean RMS over differenced time series over pairs of ZTD time series based on a sub-selection of 29 stable sites (see Chapter 3) and the whole data set.

| AC combinations | mean correlation coefficient |                   | mean RMS over differenced time series [mm] |                   |
|-----------------|------------------------------|-------------------|--------------------------------------------|-------------------|
|                 | selected sites               | complete data set | selected sites                             | complete data set |
| OSU-TUD         | 0.93                         | 0.92              | 10.3                                       | 9.3               |
| OSU-UTAS        | 0.93                         | 0.91              | 10.4                                       | 9.2               |
| OSU-NEWC        | 1.00                         | 0.99              | 1.5                                        | 2.0               |
| NEWC-TUD        | 0.93                         | 0.92              | 10.2                                       | 9.2               |
| NEWC-UTAS       | 0.93                         | 0.92              | 10.2                                       | 9.1               |
| TUD-UTAS        | 0.99                         | 0.97              | 3.3                                        | 4.0               |

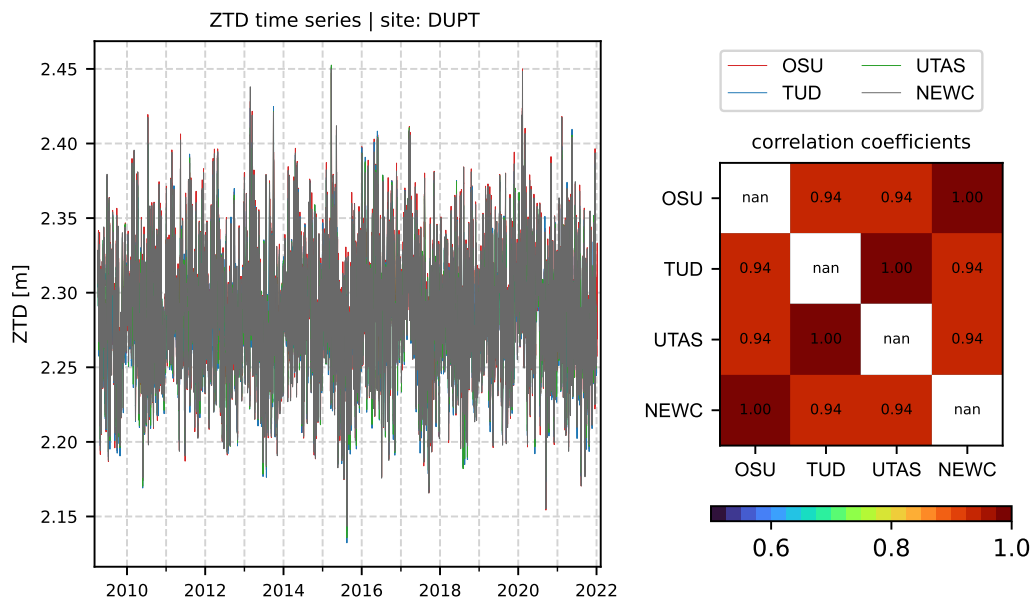

**Figure S2.** Time series of ZTD estimates from the four processing centers for the site DUPT (Duthiers Point) and their pair wise correlation coefficients.

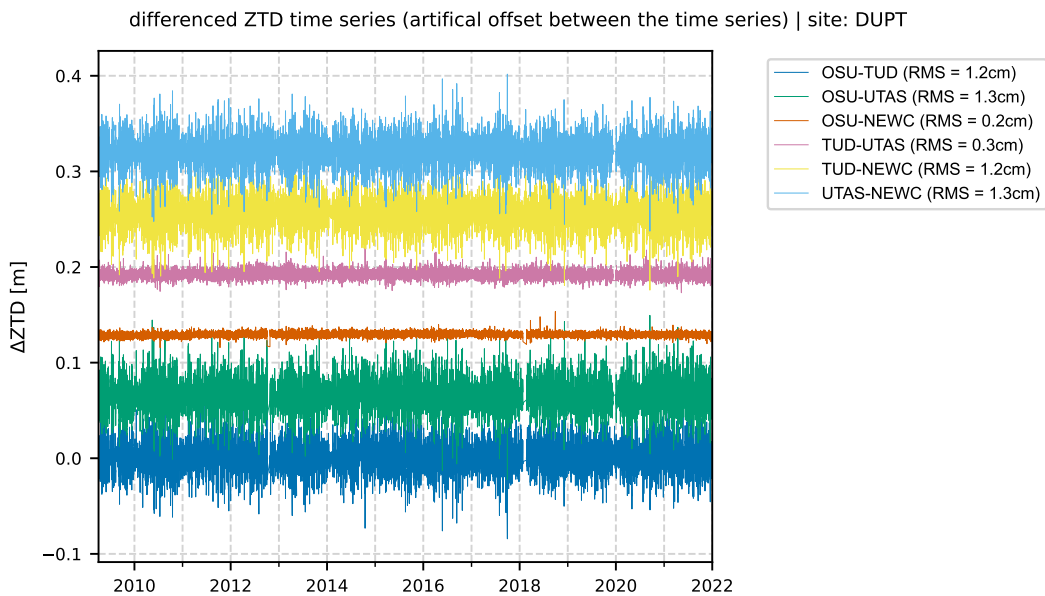

**Figure S3.** Time series of the differences of the ZTD time series for each AC pair for the site DUPT (Duthiers Point) (an artificial offset between the time series is introduced). RMS over the time series of differences is given on the right site.

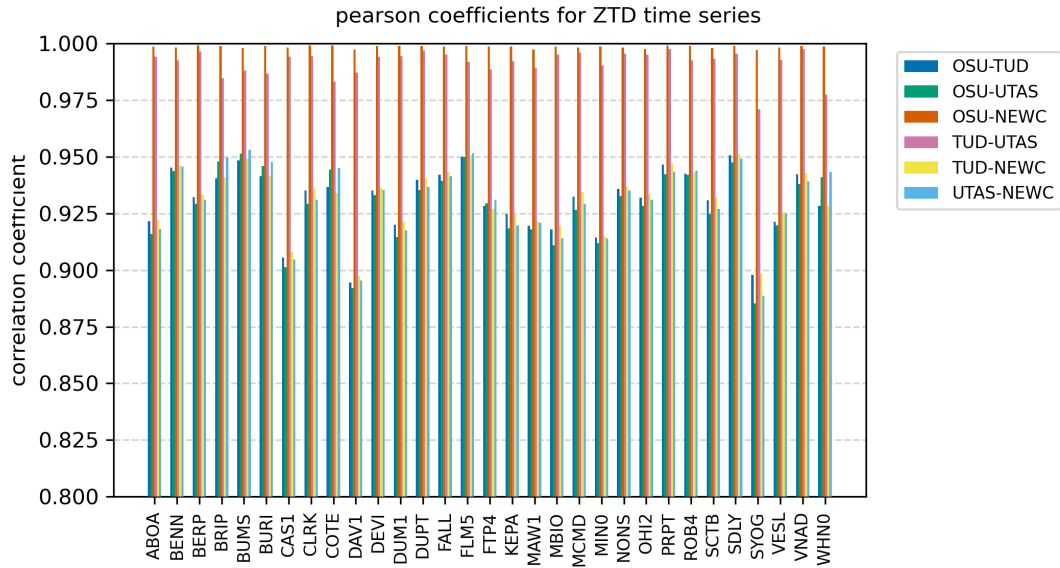

**Figure S4.** Correlation coefficients between the ZTD time series for pairs of AC solutions. Highest correlations can be found for the NEWC-OSU and TUD-UTAS correlations.

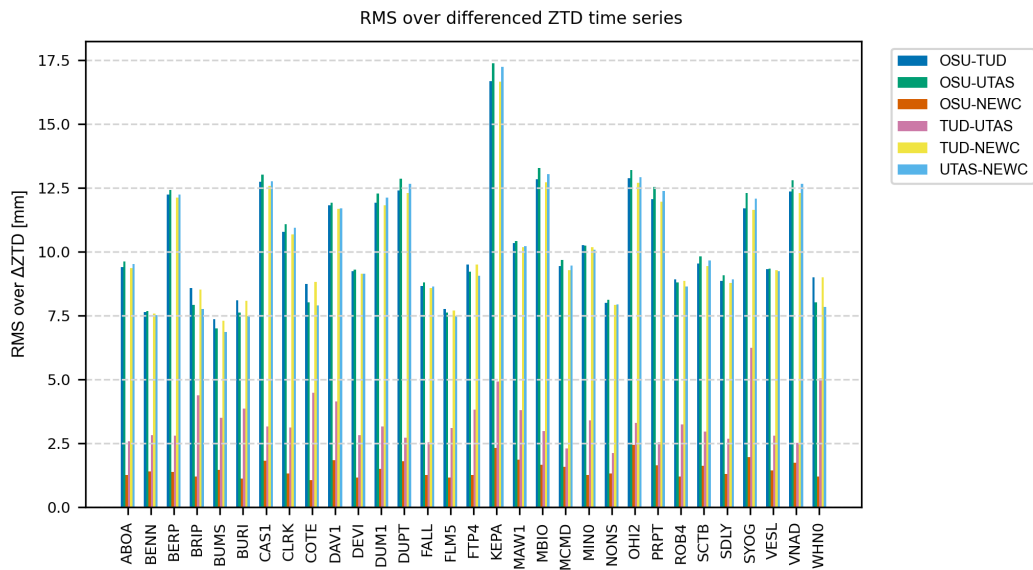

**Figure S5.** RMS over the differences ZTD time series between the AC solutions.

## References

- 45 Gómez, D. D., Bevis, M. G., and Caccamise, D. J.: Maximizing the consistency between regional and global reference frames utilizing inheritance of seasonal displacement parameters, *Journal of Geodesy*, 96, 9, <https://doi.org/10.1007/s00190-022-01594-0>, 2022.
- Ray, R. D. and Ponte, R. M.: Barometric tides from ECMWF operational analyses, *Annales Geophysicae*, 21, 1897–1910, <https://doi.org/10.5194/angeo-21-1897-2003>, 2003.
